# Supplementary material
Source: MDPI journal article supplement (https://www.mdpi.com/1999-4907/6/4/1325)
Supplement: s1 [file s1]

**Table S1.** Tukey-adjusted *p*-values for pairwise comparisons of CO2 flux (µg CO2 • g soil-C-1 • day-1) from soils incubated with charred bark (BK), pine cones (PC), and woody debris (WD), each at low (L, 0.1%) and high (H, 1.0%) concentrations, and a control (CT) measured at 10, 20, 40 and 60 days.

| ***Treatment*** | **CT10** | **BKL10** | **PCL10** | **WDL10** | **BKH10** | **PCH10** | **WDH10** | **CT20** | **BKL20** | **PCL20** | **WDL20** | **BKH20** | **PCH20** | **WDH20** | **CT40** |
| --- | --- | --- | --- | --- | --- | --- | --- | --- | --- | --- | --- | --- | --- | --- | --- |
| CT10 | – | – | – | – | – | – | – | – | – | – | – | – | – | – | – |
| BKL10 | *<.0001* | – | – | – | – | – | – | – | – | – | – | – | – | – | – |
| PCL10 | 0.717 | 0.385 | – | – | – | – | – | – | – | – | – | – | – | – | – |
| WDL10 | *<.0001* | 1.000 | 0.122 | – | – | – | – | – | – | – | – | – | – | – | – |
| BKH10 | *<.0001* | *<.0001* | *<.0001* | *<.0001* | – | – | – | – | – | – | – | – | – | – | – |
| PCH10 | 1.000 | **0.004** | 0.998 | **0.001** | *<.0001* | – | – | – | – | – | – | – | – | – | – |
| WDH10 | *<.0001* | 0.323 | *<.0001* | 0.701 | **0.001** | *<.0001* | – | – | – | – | – | – | – | – | – |
| CT20 | *<.0001* | *<.0001* | *<.0001* | *<.0001* | 1.000 | *<.0001* | **0.007** | – | – | – | – | – | – | – | – |
| BKL20 | *<.0001* | *<.0001* | *<.0001* | *<.0001* | *<.0001* | *<.0001* | *<.0001* | *<.0001* | – | – | – | – | – | – | – |
| PCL20 | *<.0001* | *<.0001* | *<.0001* | *<.0001* | **0.026** | *<.0001* | *<.0001* | **0.003** | 0.984 | – | – | – | – | – | – |
| WDL20 | *<.0001* | *<.0001* | *<.0001* | *<.0001* | *<.0001* | *<.0001* | *<.0001* | *<.0001* | 1.000 | 0.463 | – | – | – | – | – |
| BKH20 | *<.0001* | *<.0001* | *<.0001* | *<.0001* | *<.0001* | *<.0001* | *<.0001* | *<.0001* | *<.0001* | *<.0001* | **0.000** | – | – | – | – |
| PCH20 | *<.0001* | *<.0001* | *<.0001* | *<.0001* | *<.0001* | *<.0001* | *<.0001* | *<.0001* | 1.000 | 0.598 | 1.000 | **0.000** | – | – | – |
| WDH20 | *<.0001* | *<.0001* | *<.0001* | *<.0001* | *<.0001* | *<.0001* | *<.0001* | *<.0001* | 0.568 | **0.003** | 0.994 | 0.156 | 0.979 | – | – |
| CT40 | *<.0001* | *<.0001* | *<.0001* | *<.0001* | 0.428 | *<.0001* | *<.0001* | **0.023** | 0.784 | 1.000 | 0.179 | *<.0001* | 0.258 | **0.001** | – |
| BKL40 | *<.0001* | *<.0001* | *<.0001* | *<.0001* | *<.0001* | *<.0001* | *<.0001* | *<.0001* | **0.020** | **0.000** | 0.647 | 0.958 | 0.524 | 1.000 | *<.0001* |
| PCL40 | *<.0001* | *<.0001* | *<.0001* | *<.0001* | *<.0001* | *<.0001* | *<.0001* | *<.0001* | 0.997 | **0.041** | 1.000 | **0.037** | 1.000 | 1.000 | 0.057 |
| WDL40 | *<.0001* | *<.0001* | *<.0001* | *<.0001* | *<.0001* | *<.0001* | *<.0001* | *<.0001* | 0.225 | **0.001** | 0.588 | 0.848 | 0.743 | 1.000 | **0.000** |
| BKH40 | *<.0001* | *<.0001* | *<.0001* | *<.0001* | *<.0001* | *<.0001* | *<.0001* | *<.0001* | *<.0001* | *<.0001* | *<.0001* | 0.356 | *<.0001* | *<.0001* | *<.0001* |
| PCH40 | *<.0001* | *<.0001* | *<.0001* | *<.0001* | *<.0001* | *<.0001* | *<.0001* | *<.0001* | **0.017** | *<.0001* | 0.222 | 0.999 | **0.032** | 0.996 | *<.0001* |
| WDH40 | *<.0001* | *<.0001* | *<.0001* | *<.0001* | *<.0001* | *<.0001* | *<.0001* | *<.0001* | *<.0001* | *<.0001* | **0.001** | 1.000 | **0.000** | **0.035** | *<.0001* |
| CT60 | *<.0001* | *<.0001* | *<.0001* | *<.0001* | 0.935 | *<.0001* | *<.0001* | 0.485 | 0.887 | 1.000 | 0.382 | *<.0001* | 0.477 | **0.012** | 1.000 |
| BKL60 | *<.0001* | *<.0001* | *<.0001* | *<.0001* | *<.0001* | *<.0001* | *<.0001* | *<.0001* | 0.126 | **0.004** | 0.784 | 0.999 | 0.695 | 1.000 | **0.001** |
| PCL60 | *<.0001* | *<.0001* | *<.0001* | *<.0001* | **0.033** | *<.0001* | *<.0001* | **0.007** | 1.000 | 1.000 | 1.000 | **0.001** | 1.000 | 0.788 | 0.999 |
| WDL60 | *<.0001* | *<.0001* | *<.0001* | *<.0001* | *<.0001* | *<.0001* | *<.0001* | *<.0001* | 0.914 | 0.104 | 0.999 | 0.830 | 0.999 | 1.000 | **0.034** |
| BKH60 | *<.0001* | *<.0001* | *<.0001* | *<.0001* | *<.0001* | *<.0001* | *<.0001* | *<.0001* | *<.0001* | *<.0001* | *<.0001* | 0.089 | *<.0001* | *<.0001* | *<.0001* |
| PCH60 | *<.0001* | *<.0001* | *<.0001* | *<.0001* | *<.0001* | *<.0001* | *<.0001* | *<.0001* | 0.263 | **0.004** | 0.784 | 0.999 | 0.506 | 1.000 | **0.001** |
| WDH60 | *<.0001* | *<.0001* | *<.0001* | *<.0001* | *<.0001* | *<.0001* | *<.0001* | *<.0001* | **0.046** | **0.000** | 0.306 | 1.000 | 0.232 | 0.964 | *<.0001* |

**Table S1.** *Cont.*

| ***Treatment*** | **BKL40** | **PCL40** | **WDL40** | **BKH40** | **PCH40** | **WDH40** | **CT60** | **BKL60** | **PCL60** | **WDL60** | **BKH60** | **PCH60** | **WDH60** |
| --- | --- | --- | --- | --- | --- | --- | --- | --- | --- | --- | --- | --- | --- |
| CT10 | – | – | – | – | – | – | – | – | – | – | – | – | – |
| BKL10 | – | – | – | – | – | – | – | – | – | – | – | – | – |
| PCL10 | – | – | – | – | – | – | – | – | – | – | – | – | – |
| WDL10 | – | – | – | – | – | – | – | – | – | – | – | – | – |
| BKH10 | – | – | – | – | – | – | – | – | – | – | – | – | – |
| PCH10 | – | – | – | – | – | – | – | – | – | – | – | – | – |
| WDH10 | – | – | – | – | – | – | – | – | – | – | – | – | – |
| CT20 | – | – | – | – | – | – | – | – | – | – | – | – | – |
| BKL20 | – | – | – | – | – | – | – | – | – | – | – | – | – |
| PCL20 | – | – | – | – | – | – | – | – | – | – | – | – | – |
| WDL20 | – | – | – | – | – | – | – | – | – | – | – | – | – |
| BKH20 | – | – | – | – | – | – | – | – | – | – | – | – | – |
| PCH20 | – | – | – | – | – | – | – | – | – | – | – | – | – |
| WDH20 | – | – | – | – | – | – | – | – | – | – | – | – | – |
| CT40 | – | – | – | – | – | – | – | – | – | – | – | – | – |
| BKL40 | – | – | – | – | – | – | – | – | – | – | – | – | – |
| PCL40 | 0.993 | – | – | – | – | – | – | – | – | – | – | – | – |
| WDL40 | 1.000 | 0.999 | – | – | – | – | – | – | – | – | – | – | – |
| BKH40 | **0.011** | *<.0001* | **0.004** | – | – | – | – | – | – | – | – | – | – |
| PCH40 | 1.000 | 0.853 | 1.000 | 0.069 | – | – | – | – | – | – | – | – | – |
| WDH40 | 0.922 | **0.039** | 0.789 | 0.933 | 0.999 | – | – | – | – | – | – | – | – |
| CT60 | **0.001** | 0.158 | **0.003** | *<.0001* | **0.000** | *<.0001* | – | – | – | – | – | – | – |
| BKL60 | 1.000 | 0.994 | 1.000 | 0.200 | 1.000 | 0.999 | **0.005** | – | – | – | – | – | – |
| PCL60 | 0.299 | 0.986 | 0.452 | <.0001 | 0.095 | **0.001** | 0.999 | 0.392 | – | – | – | – | – |
| WDL60 | 1.000 | 1.000 | 1.000 | **0.013** | 1.000 | 0.763 | 0.080 | 1.000 | 0.923 | – | – | – | – |
| BKH60 | **0.003** | *<.0001* | **0.001** | 1.000 | **0.014** | 0.456 | *<.0001* | **0.043** | *<.0001* | **0.003** | – | – | – |
| PCH60 | 1.000 | 0.994 | 1.000 | 0.200 | 1.000 | 0.999 | **0.005** | 1.000 | 0.392 | 1.000 | **0.043** | – | – |
| WDH60 | 1.000 | 0.827 | 1.000 | 0.619 | 1.000 | 1.000 | **0.001** | 1.000 | 0.114 | 0.999 | 0.195 | 1.000 | – |

**Table S2.** Tukey-adjusted p-values for pairwise comparisons of CO2 flux (µg CO2 • g soil1 • day-1) from soils incubated with charred bark (BK), pine cones (PC), and woody debris (WD), each at low (L, 0.1%) and high (H, 1.0%) concentrations, and a control (CT) measured at 10, 20, 40 and 60 days.

| ***Treatment*** | **CT10** | **BKL10** | **PCL10** | **WDL10** | **BKH10** | **PCH10** | **WDH10** | **CT20** | **BKL20** | **PCL20** | **WDL20** | **BKH20** | **PCH20** | **WDH20** | **CT40** |
| --- | --- | --- | --- | --- | --- | --- | --- | --- | --- | --- | --- | --- | --- | --- | --- |
| CT10 | – | – | – | – | – | – | – | – | – | – | – | – | – | – | – |
| BKL10 | 0.998 | – | – | – | – | – | – | – | – | – | – | – | – | – | – |
| PCL10 | 1.000 | 1.000 | – | – | – | – | – | – | – | – | – | – | – | – | – |
| WDL10 | 1.000 | 0.100 | 1.000 | – | – | – | – | – | – | – | – | – | – | – | – |
| BKH10 | **0.003** | 0.347 | **0.041** | **0.007** | – | – | – | – | – | – | – | – | – | – | – |
| PCH10 | *<.0001* | *<.0001* | *<.0001* | *<.0001* | *<.0001* | – | – | – | – | – | – | – | – | – | – |
| WDH10 | *<.0001* | *<.0001* | *<.0001* | *<.0001* | 0.476 | *<.0001* | – | – | – | – | – | – | – | – | – |
| CT20 | *<.0001* | *<.0001* | *<.0001* | *<.0001* | *<.0001* | *<.0001* | *<.0001* | – | – | – | – | – | – | – | – |
| BKL20 | *<.0001* | *<.0001* | *<.0001* | *<.0001* | *<.0001* | *<.0001* | *<.0001* | 0.999 | – | – | – | – | – | – | – |
| PCL20 | *<.0001* | *<.0001* | *<.0001* | *<.0001* | *<.0001* | *<.0001* | *<.0001* | 0.955 | 1.000 | – | – | – | – | – | – |
| WDL20 | *<.0001* | *<.0001* | *<.0001* | *<.0001* | *<.0001* | *<.0001* | *<.0001* | 0.351 | 0.999 | 1.000 | – | – | – | – | – |
| BKH20 | *<.0001* | *<.0001* | *<.0001* | *<.0001* | *<.0001* | *<.0001* | *<.0001* | 1.000 | 1.000 | 1.000 | 0.982 | – | – | – | – |
| PCH20 | *<.0001* | *<.0001* | *<.0001* | *<.0001* | *<.0001* | *<.0001* | *<.0001* | 0.885 | 0.055 | **0.011** | **0.000** | 0.157 | – | – | – |
| WDH20 | *<.0001* | *<.0001* | *<.0001* | *<.0001* | *<.0001* | *<.0001* | *<.0001* | 1.000 | 0.998 | 0.937 | 0.308 | 1.000 | 0.912 | – | – |
| CT40 | *<.0001* | *<.0001* | *<.0001* | *<.0001* | *<.0001* | *<.0001* | *<.0001* | 0.127 | 0.100 | 1.000 | 1.000 | 0.992 | **0.001** | 0.450 | – |
| BKL40 | *<.0001* | *<.0001* | *<.0001* | *<.0001* | *<.0001* | *<.0001* | *<.0001* | **0.001** | **0.011** | 0.363 | 0.938 | **0.048** | *<.0001* | **0.001** | 0.979 |
| PCL40 | *<.0001* | *<.0001* | *<.0001* | *<.0001* | *<.0001* | *<.0001* | *<.0001* | **0.001** | 0.131 | 0.069 | 0.939 | **0.048** | *<.0001* | **0.001** | 0.980 |
| WDL40 | *<.0001* | *<.0001* | *<.0001* | *<.0001* | *<.0001* | *<.0001* | *<.0001* | **0.001** | 0.108 | 0.319 | 0.610 | **0.039** | *<.0001* | **0.001** | 0.970 |
| BKH40 | *<.0001* | *<.0001* | *<.0001* | *<.0001* | *<.0001* | *<.0001* | *<.0001* | **0.003** | 0.235 | 0.546 | 0.985 | **0.007** | *<.0001* | **0.002** | 0.996 |
| PCH40 | *<.0001* | *<.0001* | *<.0001* | *<.0001* | *<.0001* | *<.0001* | *<.0001* | 0.958 | 1.000 | 1.000 | 1.000 | 1.000 | **0.001** | 0.943 | 1.000 |
| WDH40 | *<.0001* | *<.0001* | *<.0001* | *<.0001* | *<.0001* | *<.0001* | *<.0001* | **0.025** | 0.645 | 0.917 | 1.000 | 0.380 | <.0001 | **0.001** | 1.000 |
| CT60 | *<.0001* | *<.0001* | *<.0001* | *<.0001* | *<.0001* | *<.0001* | *<.0001* | 0.784 | 1.000 | 1.000 | 1.000 | 1.000 | **0.047** | 0.913 | 1.000 |
| BKL60 | *<.0001* | *<.0001* | *<.0001* | *<.0001* | *<.0001* | *<.0001* | *<.0001* | **0.008** | 0.078 | 0.501 | 0.948 | 0.122 | *<.0001* | **0.007** | 0.977 |
| PCL60 | *<.0001* | *<.0001* | *<.0001* | *<.0001* | *<.0001* | *<.0001* | *<.0001* | 0.800 | 1.000 | 1.000 | 1.000 | 0.999 | **0.019** | 0.768 | 1.000 |
| WDL60 | *<.0001* | *<.0001* | *<.0001* | *<.0001* | *<.0001* | *<.0001* | *<.0001* | 0.100 | 0.801 | 0.959 | 0.100 | 0.593 | **0.000** | 0.087 | 1.000 |
| BKH60 | *<.0001* | *<.0001* | *<.0001* | *<.0001* | *<.0001* | *<.0001* | *<.0001* | **0.000** | **0.013** | **0.047** | 0.314 | **0.000** | *<.0001* | **0.000** | 0.449 |
| PCH60 | *<.0001* | *<.0001* | *<.0001* | *<.0001* | *<.0001* | *<.0001* | *<.0001* | 0.100 | 1.000 | 1.000 | 1.000 | 1.000 | 0.102 | 0.100 | 1.000 |
| WDH60 | *<.0001* | *<.0001* | *<.0001* | *<.0001* | *<.0001* | *<.0001* | *<.0001* | 0.919 | 1.000 | 1.000 | 1.000 | 1.000 | **0.042** | 0.718 | 1.000 |

**Table S2.** *Cont*.

| ***Treatment*** | **BKL40** | **PCL40** | **WDL40** | **BKH40** | **PCH40** | **WDH40** | **CT60** | **BKL60** | **PCL60** | **WDL60** | **BKH60** | **PCH60** | **WDH60** |
| --- | --- | --- | --- | --- | --- | --- | --- | --- | --- | --- | --- | --- | --- |
| CT10 | – | – | – | – | – | – | – | – | – | – | – | – | – |
| BKL10 | – | – | – | – | – | – | – | – | – | – | – | – | – |
| PCL10 | – | – | – | – | – | – | – | – | – | – | – | – | – |
| WDL10 | – | – | – | – | – | – | – | – | – | – | – | – | – |
| BKH10 | – | – | – | – | – | – | – | – | – | – | – | – | – |
| PCH10 | – | – | – | – | – | – | – | – | – | – | – | – | – |
| WDH10 | – | – | – | – | – | – | – | – | – | – | – | – | – |
| CT20 | – | – | – | – | – | – | – | – | – | – | – | – | – |
| BKL20 | – | – | – | – | – | – | – | – | – | – | – | – | – |
| PCL20 | – | – | – | – | – | – | – | – | – | – | – | – | – |
| WDL20 | – | – | – | – | – | – | – | – | – | – | – | – | – |
| BKH20 | – | – | – | – | – | – | – | – | – | – | – | – | – |
| PCH20 | – | – | – | – | – | – | – | – | – | – | – | – | – |
| WDH20 | – | – | – | – | – | – | – | – | – | – | – | – | – |
| CT40 | – | – | – | – | – | – | – | – | – | – | – | – | – |
| BKL40 | – | – | – | – | – | – | – | – | – | – | – | – | – |
| PCL40 | 1.000 | – | – | – | – | – | – | – | – | – | – | – | – |
| WDL40 | 1.000 | 1.000 | – | – | – | – | – | – | – | – | – | – | – |
| BKH40 | 1.000 | 1.000 | 1.000 | – | – | – | – | – | – | – | – | – | – |
| PCH40 | 0.632 | 0.635 | 0.583 | 0.793 | – | – | – | – | – | – | – | – | – |
| WDH40 | 1.000 | 1.000 | 1.000 | 1.000 | 0.984 | – | – | – | – | – | – | – | – |
| CT60 | 0.989 | 0.989 | 0.984 | 0.998 | 1.000 | 1.000 | – | – | – | – | – | – | – |
| BKL60 | 1.000 | 1.000 | 1.000 | 1.000 | 0.737 | 1.000 | 0.983 | – | – | – | – | – | – |
| PCL60 | 0.999 | 0.990 | 0.998 | 0.100 | 1.000 | 1.000 | 1.000 | 0.997 | – | – | – | – | – |
| WDL60 | 1.000 | 1.000 | 1.000 | 1.000 | 0.990 | 1.000 | 1.000 | 1.000 | 1.000 | – | – | – | – |
| BKH60 | 1.000 | 1.000 | 1.000 | 0.995 | 0.115 | 0.975 | 0.571 | 1.000 | 0.743 | 0.999 | – | – | – |
| PCH60 | 0.744 | 0.746 | 0.706 | 0.861 | 1.000 | 0.984 | 1.000 | 0.756 | 1.000 | 0.990 | 0.186 | – | – |
| WDH60 | 0.991 | 0.991 | 0.987 | 0.998 | 1.000 | 0.100 | 1.000 | 0.986 | 1.000 | 1.000 | 0.593 | 1.000 | – |
